# Supplementary material
Source: publisher figshare collection journal article supplement (https://karger.figshare.com/articles/dataset/_/4751014)
Supplement: Supplementary file 1 [file 1]

**Supplementary table 1a. FISH probes used in this study**

| Chromosome | Probe         | Company  | Case #  |
|------------|---------------|----------|---------|
| 22p        | Acro-P        | CYTOCELL | 1       |
| 22         | HIRA / NA85A3 | CYTOCELL | 4, 7, 9 |
| 22         | BCR           | Vysis    | 13      |

| Supplementary table 1b. qPCR primers for verification of genomic abnormalities on chromosome 22 |                                                                          |                         |                    |               |          |
|-------------------------------------------------------------------------------------------------|--------------------------------------------------------------------------|-------------------------|--------------------|---------------|----------|
| Primers                                                                                         | Primers sequences                                                        | Amplified region        | Amplicon size (bp) | Target genes  | Patients |
| Target primers                                                                                  | Forward: gctgcccgacaattaacagcaat<br>Reverse: tcctgccatctcattcgctggat     | chr22:18131287-18131426 | 140                | <i>TBX1</i>   | 2 to 9   |
| Target primers                                                                                  | Forward: aacagcaggtcctaggttgggaa<br>Reverse: ttctggctcactccggaaggaat     | chr22:19543945-19544052 | 108                | <i>SNAP29</i> | 10,11    |
| Target primers                                                                                  | Forward: tccaagaacccgctcggaatgta<br>Reverse: tcctgctgtattcccaccaccaa     | chr22:19652376-19652519 | 144                | <i>AIFM3</i>  | 12       |
| Target primers                                                                                  | Forward: agtggcaccatcagagcttactgt<br>Reverse: catgatgggtgtgcctgtggtt     | chr22:20650320-20650421 | 102                | <i>TOP3B</i>  | 13       |
| Target primers                                                                                  | Forward: tgaatgaccaggagttcaaggct<br>Reverse: aagtggaatctgcacatctgcct     | chr22:21885935-21886107 | 173                | <i>BCR</i>    | 14,15    |
| Target primers                                                                                  | Forward: aggagcagcgagacagagaaacat<br>Reverse: acctcgttggcagaagtagtcaca   | chr22:23624368-23624492 | 125                | <i>SGSM1</i>  | 16       |
| Target primers                                                                                  | Forward: tcctctgtttgacaggtgaggcaa<br>Reverse: tgaatcagcctgctgctccatact   | chr22:31578128-31578273 | 146                | <i>TIMP3</i>  | 17       |
| Target primers                                                                                  | Forward: accaccgatccagcagtcacatcaat<br>Reverse: attcaatcagagctgaggcagggt | chr22:40793787-40793966 | 180                | <i>NAGA</i>   | 18       |
| Target primers                                                                                  | Forward: cacagaaagccttgagttgcgt<br>Reverse: tcattggccagttggagactctgt     | chr22:49249064-49249176 | 113                | <i>SBF1</i>   | 19,20    |
| Reference primers                                                                               | Forward: atcaaagcttccttgccctctga<br>Reverse: ttggaagaggtaatcgaggcact     | chrX:13684972-13685109  | 138bp              | <i>OFD</i>    | 2 to 20  |

**Supplementary table 2. Total CNVs on chromosome 22**

| Benign CNV | Start Coordinate (kb) | Stop Coordinate (kb) | Number of Duplications | Number of Deletions | Total Number of CNVs |
|------------|-----------------------|----------------------|------------------------|---------------------|----------------------|
| 1          | 14504.02              | 14797.21             | 0                      | 15                  | 15                   |
| 2          | 14504.02              | 14884.50             | 0                      | 1                   | 1                    |
| 3          | 14504.02              | 15654.03             | 1                      | 0                   | 1                    |
| 4          | 14884.10              | 15835.04             | 1                      | 0                   | 1                    |
| 5          | 15275.40              | 15670.48             | 1                      | 0                   | 1                    |
| 6          | 15438.75              | 15670.48             | 4                      | 0                   | 4                    |
| 7          | 17021.56              | 17390.65             | 1                      | 1                   | 2                    |
| 8          | 17041.52              | 17390.65             | 2                      | 2                   | 4                    |
| 9          | 17085.80              | 17390.65             | 0                      | 5                   | 5                    |
| 10         | 17270.07              | 17390.65             | 6                      | 2                   | 8                    |
| 11         | 17270.07              | 17409.80             | 3                      | 0                   | 3                    |
| 12         | 17274.64              | 17390.65             | 3                      | 0                   | 3                    |
| 13         | 17280.25              | 17380.00             | 0                      | 1                   | 1                    |
| 14         | 17280.25              | 17390.65             | 0                      | 1                   | 1                    |
| 15         | 17284.91              | 17390.65             | 1                      | 0                   | 1                    |
| 16         | 17303.82              | 17343.51             | 0                      | 1                   | 1                    |
| 17         | 17348.69              | 17390.65             | 3                      | 0                   | 3                    |
| 18         | 17348.69              | 17519.23             | 1                      | 0                   | 1                    |
| 19         | 18358.24              | 18383.27             | 0                      | 1                   | 1                    |
| 20         | 18412.08              | 18438.18             | 0                      | 4                   | 4                    |
| 21         | 18513.41              | 18544.73             | 1                      | 0                   | 1                    |
| 22         | 18513.41              | 18650.64             | 0                      | 1                   | 1                    |
| 23         | 18523.88              | 18544.73             | 1                      | 0                   | 1                    |
| 24         | 18589.03              | 18635.31             | 1                      | 0                   | 1                    |
| 25         | 18596.93              | 18635.31             | 1                      | 0                   | 1                    |
| 26         | 18691.50              | 19039.09             | 0                      | 1                   | 1                    |
| 27         | 19125.59              | 19179.27             | 2                      | 0                   | 2                    |
| 28         | 19153.63              | 19214.77             | 1                      | 0                   | 1                    |
| 29         | 19337.10              | 19464.33             | 1                      | 0                   | 1                    |
| 30         | 19709.70              | 19776.01             | 1                      | 0                   | 1                    |
| 31         | 20558.49              | 20627.98             | 1                      | 0                   | 1                    |
| 32         | 20637.38              | 20797.50             | 1                      | 0                   | 1                    |
| 33         | 20642.93              | 20904.96             | 5                      | 2                   | 7                    |
| 34         | 20642.93              | 20912.54             | 2                      | 0                   | 2                    |
| 35         | 20652.91              | 20904.96             | 1                      | 1                   | 2                    |
| 36         | 21328.08              | 21984.36             | 0                      | 1                   | 1                    |
| 37         | 21346.55              | 21417.29             | 0                      | 1                   | 1                    |
| 38         | 21362.06              | 21417.29             | 0                      | 8                   | 8                    |
| 39         | 21375.99              | 21427.38             | 0                      | 1                   | 1                    |
| 40         | 21409.08              | 21427.38             | 0                      | 1                   | 1                    |
| 41         | 22250.23              | 22304.30             | 0                      | 1                   | 1                    |
| 42         | 22255.13              | 22289.35             | 1                      | 0                   | 1                    |
| 43         | 22255.13              | 22296.95             | 1                      | 0                   | 1                    |
| 44         | 22443.05              | 22452.53             | 1                      | 0                   | 1                    |
| 45         | 22611.90              | 22671.57             | 0                      | 1                   | 1                    |
| 46         | 22611.90              | 22686.89             | 1                      | 0                   | 1                    |
| 47         | 22611.90              | 22725.51             | 0                      | 3                   | 3                    |
| 48         | 22611.90              | 22731.40             | 0                      | 4                   | 4                    |
| 49         | 22611.90              | 22759.75             | 0                      | 2                   | 2                    |
| 50         | 22644.08              | 22731.40             | 0                      | 1                   | 1                    |
| 51         | 22656.63              | 22671.57             | 0                      | 1                   | 1                    |
| 52         | 22656.63              | 22725.51             | 7                      | 1                   | 8                    |
| 53         | 22658.34              | 22725.51             | 0                      | 1                   | 1                    |

|     |          |          |     |     |     |
|-----|----------|----------|-----|-----|-----|
| 54  | 22671.17 | 22725.51 | 0   | 2   | 2   |
| 55  | 22677.76 | 22686.89 | 0   | 3   | 3   |
| 56  | 22677.76 | 22696.36 | 0   | 13  | 13  |
| 57  | 22677.76 | 22706.37 | 0   | 1   | 1   |
| 58  | 22677.76 | 22716.12 | 1   | 0   | 1   |
| 59  | 22677.76 | 22725.51 | 322 | 189 | 511 |
| 60  | 22677.76 | 22731.40 | 3   | 0   | 3   |
| 61  | 22677.76 | 22737.19 | 1   | 0   | 1   |
| 62  | 22681.80 | 22696.36 | 0   | 15  | 15  |
| 63  | 22686.49 | 22716.12 | 1   | 0   | 1   |
| 64  | 22686.49 | 22720.40 | 6   | 0   | 6   |
| 65  | 22686.49 | 22725.51 | 7   | 1   | 8   |
| 66  | 22686.49 | 22731.40 | 0   | 1   | 1   |
| 67  | 22695.96 | 22706.37 | 1   | 0   | 1   |
| 68  | 22695.96 | 22720.40 | 12  | 17  | 29  |
| 69  | 22695.96 | 22725.51 | 10  | 13  | 23  |
| 70  | 22701.01 | 22712.41 | 0   | 1   | 1   |
| 71  | 22701.01 | 22720.40 | 8   | 63  | 71  |
| 72  | 22701.01 | 22725.51 | 0   | 7   | 7   |
| 73  | 22705.97 | 22720.40 | 0   | 48  | 48  |
| 74  | 22705.97 | 22725.51 | 0   | 1   | 1   |
| 75  | 22712.01 | 22720.40 | 0   | 13  | 13  |
| 76  | 22712.01 | 22725.51 | 0   | 1   | 1   |
| 77  | 23951.72 | 24254.23 | 1   | 0   | 1   |
| 78  | 23972.84 | 24233.68 | 4   | 0   | 4   |
| 79  | 23972.84 | 24254.23 | 1   | 0   | 1   |
| 80  | 23983.87 | 24233.68 | 17  | 0   | 17  |
| 81  | 23983.87 | 24254.23 | 1   | 0   | 1   |
| 82  | 23983.87 | 24268.76 | 1   | 0   | 1   |
| 83  | 23983.87 | 24331.64 | 1   | 0   | 1   |
| 84  | 23994.42 | 24233.68 | 16  | 18  | 34  |
| 85  | 23994.42 | 24254.23 | 6   | 2   | 8   |
| 86  | 23994.42 | 24268.76 | 0   | 1   | 1   |
| 87  | 24017.49 | 24233.68 | 1   | 1   | 2   |
| 88  | 24031.93 | 24331.64 | 1   | 0   | 1   |
| 89  | 24087.52 | 24098.65 | 0   | 1   | 1   |
| 90  | 24716.72 | 24738.26 | 0   | 1   | 1   |
| 91  | 25347.91 | 25359.07 | 0   | 1   | 1   |
| 92  | 28472.98 | 28481.88 | 0   | 2   | 2   |
| 93  | 28835.48 | 28877.98 | 1   | 0   | 1   |
| 94  | 29973.26 | 30181.38 | 1   | 0   | 1   |
| 95  | 29997.18 | 30106.91 | 1   | 0   | 1   |
| 96  | 30608.73 | 30638.87 | 0   | 2   | 2   |
| 97  | 30868.16 | 31015.99 | 1   | 0   | 1   |
| 98  | 31345.09 | 31428.70 | 1   | 0   | 1   |
| 99  | 31375.79 | 31509.06 | 1   | 0   | 1   |
| 100 | 31695.77 | 31716.88 | 0   | 1   | 1   |
| 101 | 32340.14 | 32373.88 | 0   | 1   | 1   |
| 102 | 32494.43 | 32518.80 | 0   | 1   | 1   |
| 103 | 34950.07 | 35039.31 | 1   | 0   | 1   |
| 104 | 36663.48 | 36673.17 | 0   | 1   | 1   |
| 105 | 37677.01 | 37715.59 | 0   | 2   | 2   |
| 106 | 37683.32 | 37715.59 | 0   | 11  | 11  |
| 107 | 37688.86 | 37702.49 | 0   | 2   | 2   |
| 108 | 37688.86 | 37707.20 | 2   | 2   | 4   |
| 109 | 37688.86 | 37715.59 | 1   | 170 | 171 |
| 110 | 37688.86 | 37718.87 | 0   | 2   | 2   |

|                    |          |          |     |     |      |
|--------------------|----------|----------|-----|-----|------|
| 111                | 37696.76 | 37715.59 | 0   | 3   | 3    |
| 112                | 37710.56 | 37738.75 | 1   | 0   | 1    |
| 113                | 37752.45 | 37775.17 | 0   | 1   | 1    |
| 114                | 39213.55 | 39224.33 | 1   | 0   | 1    |
| 115                | 39504.85 | 39517.10 | 1   | 0   | 1    |
| 116                | 40091.06 | 40135.94 | 0   | 1   | 1    |
| 117                | 40848.31 | 40867.53 | 3   | 0   | 3    |
| 118                | 40960.49 | 41312.82 | 0   | 1   | 1    |
| 119                | 41110.92 | 41219.60 | 1   | 0   | 1    |
| 120                | 41226.44 | 41275.16 | 0   | 1   | 1    |
| 121                | 41226.44 | 41279.69 | 5   | 15  | 20   |
| 122                | 41226.44 | 41287.26 | 0   | 6   | 6    |
| 123                | 41226.44 | 41363.43 | 0   | 1   | 1    |
| 124                | 41237.53 | 41248.37 | 2   | 0   | 2    |
| 125                | 41237.53 | 41254.71 | 1   | 0   | 1    |
| 126                | 41237.53 | 41275.16 | 4   | 2   | 6    |
| 127                | 41237.53 | 41279.69 | 19  | 10  | 29   |
| 128                | 41237.53 | 41287.26 | 0   | 1   | 1    |
| 129                | 41241.59 | 41295.87 | 1   | 0   | 1    |
| 130                | 41241.59 | 41299.23 | 1   | 0   | 1    |
| 131                | 41279.29 | 41295.87 | 2   | 1   | 3    |
| 132                | 41286.86 | 41295.87 | 0   | 11  | 11   |
| 133                | 41286.86 | 41299.23 | 1   | 0   | 1    |
| 134                | 41941.22 | 41989.93 | 1   | 0   | 1    |
| 135                | 43012.01 | 43034.91 | 1   | 0   | 1    |
| 136                | 43498.80 | 43571.98 | 0   | 2   | 2    |
| 137                | 43571.58 | 43602.91 | 0   | 1   | 1    |
| 138                | 43752.63 | 43772.26 | 0   | 1   | 1    |
| 139                | 44319.81 | 44504.16 | 1   | 0   | 1    |
| 140                | 44696.65 | 44735.38 | 0   | 1   | 1    |
| 141                | 44717.63 | 44735.38 | 4   | 3   | 7    |
| 142                | 44857.05 | 49566.02 | 0   | 1   | 1    |
| 143                | 44871.50 | 44884.63 | 0   | 1   | 1    |
| 144                | 45129.03 | 45152.07 | 0   | 1   | 1    |
| 145                | 45729.18 | 45826.12 | 0   | 1   | 1    |
| 146                | 46904.27 | 46912.86 | 1   | 0   | 1    |
| 147                | 47672.56 | 47802.40 | 1   | 0   | 1    |
| 148                | 47785.45 | 48381.33 | 1   | 0   | 1    |
| 149                | 48229.79 | 48292.08 | 0   | 2   | 2    |
| 150                | 48319.49 | 48429.87 | 1   | 0   | 1    |
| 151                | 48553.80 | 48573.55 | 3   | 0   | 3    |
| 152                | 48850.95 | 48865.84 | 1   | 0   | 1    |
| 153                | 48958.91 | 48966.27 | 1   | 2   | 3    |
| 154                | 49000.59 | 49059.34 | 0   | 1   | 1    |
| 155                | 49364.90 | 49377.30 | 1   | 0   | 1    |
| 156                | 49483.99 | 49499.91 | 1   | 0   | 1    |
| <b>Grand Total</b> |          |          | 550 | 748 | 1298 |

**Supplementary table 3: Consolidated benign CNVs on chromosome 22**

| Benign CNV | Start Coordinate (kb) | Stop Coordinate (kb)  | Number of Duplications | Number of Deletions | Total Number of CNVs |
|------------|-----------------------|-----------------------|------------------------|---------------------|----------------------|
| 1          | 14504.018             | 14797.208 - 15654.025 | 1                      | 16                  | 17                   |
| 2          | 14884.098             | 15835.035             | 1                      | 0                   | 1                    |
| 3          | 15275.397 - 15438.746 | 15670.475             | 5                      | 0                   | 5                    |
| 4          | 17021.562 - 17348.691 | 17390.649 - 17519.227 | 20                     | 13                  | 33                   |
| 5          | 18358.244 - 18691.504 | 18383.270 - 19039.090 | 4                      | 7                   | 11                   |
| 6          | 19125.592 - 19337.095 | 19179.268 - 19464.326 | 4                      | 0                   | 4                    |
| 7          | 19709.703             | 19776.005             | 1                      | 0                   | 1                    |
| 8          | 20558.485             | 20627.977             | 1                      | 0                   | 1                    |
| 9          | 20637.383 - 20652.905 | 20797.502 - 20912.542 | 9                      | 3                   | 12                   |
| 10         | 21328.084 - 21409.081 | 21417.294 - 21984.363 | 0                      | 12                  | 12                   |
| 11         | 22250.229 - 22443.048 | 22289.345 - 22452.528 | 3                      | 1                   | 4                    |
| 12         | 22611.900 - 22712.011 | 22671.574 - 22759.751 | 380                    | 403                 | 783                  |
| 13         | 23951.722 - 24087.522 | 24098.654 - 24331.637 | 50                     | 23                  | 73                   |
| 14         | 24716.719             | 24738.256             | 0                      | 1                   | 1                    |
| 15         | 25347.913             | 25359.066             | 0                      | 1                   | 1                    |
| 16         | 28472.977             | 28481.880             | 0                      | 2                   | 2                    |
| 17         | 28835.482             | 28877.983             | 1                      | 0                   | 1                    |
| 18         | 29973.262             | 30181.384             | 1                      | 0                   | 1                    |
| 19         | 29997.180             | 30106.905             | 1                      | 0                   | 1                    |
| 20         | 30608.730             | 30638.865             | 0                      | 2                   | 2                    |
| 21         | 30868.157             | 31015.993             | 1                      | 0                   | 1                    |
| 22         | 31345.092             | 31428.696             | 1                      | 0                   | 1                    |
| 23         | 31375.790             | 31509.063             | 1                      | 0                   | 1                    |
| 24         | 31695.771             | 31716.875             | 0                      | 1                   | 1                    |
| 25         | 32340.138             | 32373.879             | 0                      | 1                   | 1                    |
| 26         | 32494.428             | 32518.800             | 0                      | 1                   | 1                    |
| 27         | 34950.070             | 35039.313             | 1                      | 0                   | 1                    |
| 28         | 36663.477             | 36673.173             | 0                      | 1                   | 1                    |
| 29         | 37677.010 - 37710.556 | 37702.489 - 37738.747 | 4                      | 192                 | 196                  |
| 30         | 37752.446             | 37775.173             | 0                      | 1                   | 1                    |
| 31         | 39213.551             | 39224.333             | 1                      | 0                   | 1                    |
| 32         | 39504.850             | 39517.097             | 1                      | 0                   | 1                    |
| 33         | 40091.064             | 40135.938             | 0                      | 1                   | 1                    |
| 34         | 40848.310             | 40867.531             | 3                      | 0                   | 3                    |
| 35         | 40960.494 - 41286.860 | 41219.595 - 41363.433 | 37                     | 49                  | 86                   |
| 36         | 41941.224             | 41989.926             | 1                      | 0                   | 1                    |
| 37         | 43012.006             | 43034.911             | 1                      | 0                   | 1                    |
| 38         | 43498.796             | 43571.983             | 0                      | 2                   | 2                    |
| 39         | 43571.583             | 43602.910             | 0                      | 1                   | 1                    |
| 40         | 43752.632             | 43772.259             | 0                      | 1                   | 1                    |
| 41         | 44319.810             | 44504.161             | 1                      | 0                   | 1                    |
| 42         | 44696.650             | 44735.383             | 0                      | 1                   | 1                    |
| 43         | 44717.631             | 44735.383             | 4                      | 3                   | 7                    |
| 44         | 44857.050             | 49566.016             | 0                      | 1                   | 1                    |
| 45         | 44871.498             | 44884.632             | 0                      | 1                   | 1                    |
| 46         | 45129.031             | 45152.073             | 0                      | 1                   | 1                    |
| 47         | 45729.181             | 45826.122             | 0                      | 1                   | 1                    |
| 48         | 46904.272             | 46912.855             | 1                      | 0                   | 1                    |
| 49         | 47672.563             | 47802.402             | 1                      | 0                   | 1                    |
| 50         | 47785.450             | 48381.327             | 1                      | 0                   | 1                    |
| 51         | 48229.788             | 48292.084             | 0                      | 2                   | 2                    |
| 52         | 48319.488             | 48429.872             | 1                      | 0                   | 1                    |
| 53         | 48553.800             | 48573.553             | 3                      | 0                   | 3                    |

|                    |           |           |     |     |      |
|--------------------|-----------|-----------|-----|-----|------|
| 54                 | 48850.948 | 48865.840 | 1   | 0   | 1    |
| 55                 | 48958.906 | 48966.272 | 1   | 2   | 3    |
| 56                 | 49000.586 | 49059.341 | 0   | 1   | 1    |
| 57                 | 49364.901 | 49377.297 | 1   | 0   | 1    |
| 58                 | 49483.992 | 49499.911 | 1   | 0   | 1    |
| <b>Grand Total</b> |           |           | 550 | 748 | 1298 |

**Supplementary table 4. start coordinates in all benign CNVs**

|    | Start Coordinate<br>(kb) | Duplication | Deletion | Grand Total |
|----|--------------------------|-------------|----------|-------------|
| 1  | 14504.018                | 1           | 16       | 17          |
| 2  | 14884.098                | 1           | 0        | 1           |
| 3  | 15275.397                | 1           | 0        | 1           |
| 4  | 15438.746                | 4           | 0        | 4           |
| 5  | 17021.562                | 1           | 1        | 2           |
| 6  | 17041.524                | 2           | 2        | 4           |
| 7  | 17085.801                | 0           | 5        | 5           |
| 8  | 17270.071                | 9           | 2        | 11          |
| 9  | 17274.635                | 3           | 0        | 3           |
| 10 | 17280.246                | 0           | 2        | 2           |
| 11 | 17284.91                 | 1           | 0        | 1           |
| 12 | 17303.815                | 0           | 1        | 1           |
| 13 | 17348.691                | 4           | 0        | 4           |
| 14 | 18358.244                | 0           | 1        | 1           |
| 15 | 18412.08                 | 0           | 4        | 4           |
| 16 | 18513.409                | 1           | 1        | 2           |
| 17 | 18523.876                | 1           | 0        | 1           |
| 18 | 18589.033                | 1           | 0        | 1           |
| 19 | 18596.932                | 1           | 0        | 1           |
| 20 | 18691.504                | 0           | 1        | 1           |
| 21 | 19125.592                | 2           | 0        | 2           |
| 22 | 19153.629                | 1           | 0        | 1           |
| 23 | 19337.095                | 1           | 0        | 1           |
| 24 | 19709.703                | 1           | 0        | 1           |
| 25 | 20558.485                | 1           | 0        | 1           |
| 26 | 20637.383                | 1           | 0        | 1           |
| 27 | 20642.928                | 7           | 2        | 9           |
| 28 | 20652.905                | 1           | 1        | 2           |
| 29 | 21328.084                | 0           | 1        | 1           |
| 30 | 21346.55                 | 0           | 1        | 1           |
| 31 | 21362.055                | 0           | 8        | 8           |
| 32 | 21375.986                | 0           | 1        | 1           |
| 33 | 21409.081                | 0           | 1        | 1           |
| 34 | 22250.229                | 0           | 1        | 1           |
| 35 | 22255.129                | 2           | 0        | 2           |
| 36 | 22443.048                | 1           | 0        | 1           |
| 37 | 22611.9                  | 1           | 10       | 11          |
| 38 | 22644.079                | 0           | 1        | 1           |
| 39 | 22656.631                | 7           | 2        | 9           |
| 40 | 22658.343                | 0           | 1        | 1           |
| 41 | 22671.174                | 0           | 2        | 2           |
| 42 | 22677.759                | 327         | 206      | 533         |
| 43 | 22681.795                | 0           | 15       | 15          |
| 44 | 22686.49                 | 14          | 2        | 16          |
| 45 | 22695.962                | 23          | 30       | 53          |
| 46 | 22701.005                | 8           | 71       | 79          |
| 47 | 22705.966                | 0           | 49       | 49          |



|    |           |    |     |     |
|----|-----------|----|-----|-----|
| 48 | 22712.011 | 0  | 14  | 14  |
| 49 | 23951.722 | 1  | 0   | 1   |
| 50 | 23972.84  | 5  | 0   | 5   |
| 51 | 23983.869 | 20 | 0   | 20  |
| 52 | 23994.418 | 22 | 21  | 43  |
| 53 | 24017.489 | 1  | 1   | 2   |
| 54 | 24031.933 | 1  | 0   | 1   |
| 55 | 24087.522 | 0  | 1   | 1   |
| 56 | 24716.719 | 0  | 1   | 1   |
| 57 | 25347.913 | 0  | 1   | 1   |
| 58 | 28472.977 | 0  | 2   | 2   |
| 59 | 28835.482 | 1  | 0   | 1   |
| 60 | 29973.262 | 1  | 0   | 1   |
| 61 | 29997.18  | 1  | 0   | 1   |
| 62 | 30608.73  | 0  | 2   | 2   |
| 63 | 30868.157 | 1  | 0   | 1   |
| 64 | 31345.092 | 1  | 0   | 1   |
| 65 | 31375.79  | 1  | 0   | 1   |
| 66 | 31695.771 | 0  | 1   | 1   |
| 67 | 32340.138 | 0  | 1   | 1   |
| 68 | 32494.428 | 0  | 1   | 1   |
| 69 | 34950.07  | 1  | 0   | 1   |
| 70 | 36663.477 | 0  | 1   | 1   |
| 71 | 37677.01  | 0  | 2   | 2   |
| 72 | 37683.316 | 0  | 11  | 11  |
| 73 | 37688.858 | 3  | 176 | 179 |
| 74 | 37696.764 | 0  | 3   | 3   |
| 75 | 37710.556 | 1  | 0   | 1   |
| 76 | 37752.446 | 0  | 1   | 1   |
| 77 | 39213.551 | 1  | 0   | 1   |
| 78 | 39504.85  | 1  | 0   | 1   |
| 79 | 40091.064 | 0  | 1   | 1   |
| 80 | 40848.31  | 1  | 0   | 1   |
| 81 | 40854.254 | 2  | 0   | 2   |
| 82 | 40960.494 | 0  | 1   | 1   |
| 83 | 41110.915 | 1  | 0   | 1   |
| 84 | 41226.436 | 5  | 23  | 28  |
| 85 | 41237.531 | 26 | 13  | 39  |
| 86 | 41241.586 | 2  | 0   | 2   |
| 87 | 41279.285 | 2  | 1   | 3   |
| 88 | 41286.86  | 1  | 11  | 12  |
| 89 | 41941.224 | 1  | 0   | 1   |
| 90 | 43012.006 | 1  | 0   | 1   |
| 91 | 43498.796 | 0  | 2   | 2   |
| 92 | 43571.583 | 0  | 1   | 1   |
| 93 | 43752.632 | 0  | 1   | 1   |
| 94 | 44319.81  | 1  | 0   | 1   |
| 95 | 44696.65  | 0  | 1   | 1   |
| 96 | 44717.631 | 4  | 3   | 7   |
| 97 | 44857.05  | 0  | 1   | 1   |

|                    |           |            |            |             |
|--------------------|-----------|------------|------------|-------------|
| 98                 | 44871.498 | 0          | 1          | 1           |
| 99                 | 45129.031 | 0          | 1          | 1           |
| 100                | 45729.181 | 0          | 1          | 1           |
| 101                | 46904.272 | 1          | 0          | 1           |
| 102                | 47672.563 | 1          | 0          | 1           |
| 103                | 47785.45  | 1          | 0          | 1           |
| 104                | 48229.788 | 0          | 2          | 2           |
| 105                | 48319.488 | 1          | 0          | 1           |
| 106                | 48553.8   | 3          | 0          | 3           |
| 107                | 48850.948 | 1          | 0          | 1           |
| 108                | 48958.906 | 1          | 2          | 3           |
| 109                | 49000.586 | 0          | 1          | 1           |
| 110                | 49364.901 | 1          | 0          | 1           |
| 111                | 49483.992 | 1          | 0          | 1           |
| <b>Grand Total</b> |           | <b>550</b> | <b>748</b> | <b>1298</b> |

**Supplementary table 5. stop coordinates in all benign CNVs**

|    | <b>Stop<br/>Coordinate<br/>(kb)</b> | <b>Duplication</b> | <b>Deletion</b> | <b>Grand<br/>Total</b> |
|----|-------------------------------------|--------------------|-----------------|------------------------|
| 1  | 14797.208                           | 0                  | 15              | 15                     |
| 2  | 14884.498                           | 0                  | 1               | 1                      |
| 3  | 15654.025                           | 1                  | 0               | 1                      |
| 4  | 15670.475                           | 5                  | 0               | 5                      |
| 5  | 15835.035                           | 1                  | 0               | 1                      |
| 6  | 17343.506                           | 0                  | 1               | 1                      |
| 7  | 17380.003                           | 0                  | 1               | 1                      |
| 8  | 17390.649                           | 16                 | 11              | 27                     |
| 9  | 17409.802                           | 3                  | 0               | 3                      |
| 10 | 17519.227                           | 1                  | 0               | 1                      |
| 11 | 18383.27                            | 0                  | 1               | 1                      |
| 12 | 18438.18                            | 0                  | 4               | 4                      |
| 13 | 18544.726                           | 2                  | 0               | 2                      |
| 14 | 18635.31                            | 2                  | 0               | 2                      |
| 15 | 18650.642                           | 0                  | 1               | 1                      |
| 16 | 19039.09                            | 0                  | 1               | 1                      |
| 17 | 19179.268                           | 2                  | 0               | 2                      |
| 18 | 19214.768                           | 1                  | 0               | 1                      |
| 19 | 19464.326                           | 1                  | 0               | 1                      |
| 20 | 19776.005                           | 1                  | 0               | 1                      |
| 21 | 20627.977                           | 1                  | 0               | 1                      |
| 22 | 20797.502                           | 1                  | 0               | 1                      |
| 23 | 20904.961                           | 6                  | 3               | 9                      |
| 24 | 20912.542                           | 2                  | 0               | 2                      |
| 25 | 21417.294                           | 0                  | 9               | 9                      |
| 26 | 21427.378                           | 0                  | 2               | 2                      |
| 27 | 21984.363                           | 0                  | 1               | 1                      |
| 28 | 22289.345                           | 1                  | 0               | 1                      |
| 29 | 22296.947                           | 1                  | 0               | 1                      |
| 30 | 22304.297                           | 0                  | 1               | 1                      |
| 31 | 22452.528                           | 1                  | 0               | 1                      |
| 32 | 22671.574                           | 0                  | 2               | 2                      |
| 33 | 22686.89                            | 1                  | 3               | 4                      |
| 34 | 22696.362                           | 0                  | 28              | 28                     |
| 35 | 22706.366                           | 1                  | 1               | 2                      |
| 36 | 22712.411                           | 0                  | 1               | 1                      |
| 37 | 22716.119                           | 2                  | 0               | 2                      |
| 38 | 22720.395                           | 45                 | 161             | 206                    |
| 39 | 22725.505                           | 327                | 199             | 526                    |
| 40 | 22731.396                           | 3                  | 6               | 9                      |
| 41 | 22737.19                            | 1                  | 0               | 1                      |
| 42 | 22759.751                           | 0                  | 2               | 2                      |
| 43 | 24098.654                           | 0                  | 1               | 1                      |
| 44 | 24233.684                           | 38                 | 19              | 57                     |
| 45 | 24254.226                           | 9                  | 2               | 11                     |
| 46 | 24268.762                           | 0                  | 1               | 1                      |
| 47 | 24268.762                           | 1                  | 0               | 1                      |
| 48 | 24331.637                           | 2                  | 0               | 2                      |
| 49 | 24738.256                           | 0                  | 1               | 1                      |
| 50 | 25359.066                           | 0                  | 1               | 1                      |
| 51 | 28481.88                            | 0                  | 2               | 2                      |
| 52 | 28877.983                           | 1                  | 0               | 1                      |
| 53 | 30106.905                           | 1                  | 0               | 1                      |

|                    |           |            |            |             |
|--------------------|-----------|------------|------------|-------------|
| 54                 | 30181.384 | 1          | 0          | 1           |
| 55                 | 30638.865 | 0          | 2          | 2           |
| 56                 | 31015.993 | 1          | 0          | 1           |
| 57                 | 31428.696 | 1          | 0          | 1           |
| 58                 | 31509.063 | 1          | 0          | 1           |
| 59                 | 31716.875 | 0          | 1          | 1           |
| 60                 | 32373.879 | 0          | 1          | 1           |
| 61                 | 32518.8   | 0          | 1          | 1           |
| 62                 | 35039.313 | 1          | 0          | 1           |
| 63                 | 36673.173 | 0          | 1          | 1           |
| 64                 | 37702.489 | 0          | 2          | 2           |
| 65                 | 37707.198 | 2          | 2          | 4           |
| 66                 | 37715.585 | 1          | 186        | 187         |
| 67                 | 37718.869 | 0          | 2          | 2           |
| 68                 | 37738.747 | 1          | 0          | 1           |
| 69                 | 37775.173 | 0          | 1          | 1           |
| 70                 | 39224.333 | 1          | 0          | 1           |
| 71                 | 39517.097 | 1          | 0          | 1           |
| 72                 | 40135.938 | 0          | 1          | 1           |
| 73                 | 40867.531 | 3          | 0          | 3           |
| 74                 | 41219.595 | 1          | 0          | 1           |
| 75                 | 41248.373 | 2          | 0          | 2           |
| 76                 | 41254.713 | 1          | 0          | 1           |
| 77                 | 41275.158 | 4          | 3          | 7           |
| 78                 | 41279.685 | 24         | 25         | 49          |
| 79                 | 41287.26  | 0          | 7          | 7           |
| 80                 | 41295.873 | 3          | 12         | 15          |
| 81                 | 41299.225 | 2          | 0          | 2           |
| 82                 | 41312.82  | 0          | 1          | 1           |
| 83                 | 41363.433 | 0          | 1          | 1           |
| 84                 | 41989.926 | 1          | 0          | 1           |
| 85                 | 43034.911 | 1          | 0          | 1           |
| 86                 | 43571.983 | 0          | 2          | 2           |
| 87                 | 43602.91  | 0          | 1          | 1           |
| 88                 | 43772.259 | 0          | 1          | 1           |
| 89                 | 44504.161 | 1          | 0          | 1           |
| 90                 | 44735.383 | 4          | 4          | 8           |
| 91                 | 44884.632 | 0          | 1          | 1           |
| 92                 | 45152.073 | 0          | 1          | 1           |
| 93                 | 45826.122 | 0          | 1          | 1           |
| 94                 | 46912.855 | 1          | 0          | 1           |
| 95                 | 47802.402 | 1          | 0          | 1           |
| 96                 | 48292.084 | 0          | 2          | 2           |
| 97                 | 48381.327 | 1          | 0          | 1           |
| 98                 | 48429.872 | 1          | 0          | 1           |
| 99                 | 48573.553 | 3          | 0          | 3           |
| 100                | 48865.84  | 1          | 0          | 1           |
| 101                | 48966.272 | 1          | 2          | 3           |
| 102                | 49059.341 | 0          | 1          | 1           |
| 103                | 49377.297 | 1          | 0          | 1           |
| 104                | 49499.911 | 1          | 0          | 1           |
| 105                | 49566.016 | 0          | 1          | 1           |
| <b>Grand Total</b> |           | <b>550</b> | <b>748</b> | <b>1298</b> |

**Supplementary Table 6. Major clinical features in patients with a ~ 0.5 Mb deletion between LCR22-3b and LCR22-4**

| Kurahashi 1996                                              | D'Angelo 2007                                                           | Fernández 2009                      | Patient 10          | Patient 11                    |
|-------------------------------------------------------------|-------------------------------------------------------------------------|-------------------------------------|---------------------|-------------------------------|
| Facial dysmorphism,<br>conotruncal anomaly<br>face syndrome | Mild facial features                                                    | Atypical facial<br>dysmorphism      |                     | Facial dysmorphism            |
|                                                             | Neurodevelopmental,<br>behavioural and psychiatric<br>spectrum disorder |                                     | Developmental delay | Speech delay                  |
| Tetralogy of Fallot,<br>Pulmonary atresia                   |                                                                         | Atypical congenital<br>heart defect |                     | Microcephaly, hearing<br>loss |
